# Supplementary material for: Sex and Circadian Timing Modulate Oxaliplatin Hematological and Hematopoietic Toxicities
Source: MDPI journal article supplement (doi:10.3390/pharmaceutics14112465), 2022-11-15
Supplement: s1 [file s1]

---

**SUPPLEMENTARY MATERIALS**


---

|                    |                                      | <b>Female<br/>Control</b> | <b>Male<br/>Control</b> |                             | <b>Female<br/>5mg/kg</b> | <b>Male<br/>5mg/kg</b> | <b>Male<br/>10mg/kg</b> |
|--------------------|--------------------------------------|---------------------------|-------------------------|-----------------------------|--------------------------|------------------------|-------------------------|
| <b>Lymphocytes</b> | <b>Mesor (10<sup>9</sup> cell/L)</b> | 42.58±1.68                | 37.62±1.66              | <b>Mesor (% of control)</b> | 62.64±5.63               | 79.08±15.73            | 54.67±3.74              |
|                    | <b>Ampl. (% of Mesor)</b>            | 51.9± 6.09                | 51.8 ± 6.57             | <b>Ampl. (% of Mesor)</b>   | 34.17 ± 11.69            | NS                     | 24.67 ± 9.98            |
|                    | <b>Phase (ZT)</b>                    | 6h ± 25min                | 5h19 ± 28 min           | <b>Phase (ZT)</b>           | 22h07± 1h16              | NS                     | 14h27 ± 1h29            |
|                    | <b>p values</b>                      | <0.001                    | <0.001                  | <b>p values</b>             | 0.014                    | 0.60                   | 0.048                   |
| <b>Monocytes</b>   | <b>Mesor (10<sup>9</sup> cell/L)</b> | 0.99±0.07                 | 1.52±0.16               | <b>Mesor (% of control)</b> | 86.21±63.73              | 98.68±798              | 94.90±151.79            |
|                    | <b>Ampl. (% of Mesor)</b>            | 29.36±10.9                | 45.8±15.6               | <b>Ampl. (% of Mesor)</b>   | NS                       | NS                     | NS                      |
|                    | <b>Phase (ZT)</b>                    | 6h56 ± 6min               | 4h27±1h14               | <b>Phase (ZT)</b>           | NS                       | NS                     | NS                      |
|                    | <b>p values</b>                      | 0.026                     | 0.012                   | <b>p values</b>             | 0.66                     | 0.92                   | 0.29                    |
| <b>Neutrophils</b> | <b>Mesor (10<sup>9</sup> cell/L)</b> | 4.48±0.31                 | 6.45±0.44               | <b>Mesor (% of control)</b> | 118.43±102               | 71.43±21.14            | 88.35±68.81             |
|                    | <b>Ampl. (% of Mesor)</b>            | 64.43± 10.77              | 51.83 ± 10.26           | <b>Ampl. (% of Mesor)</b>   | NS                       | NS                     | 50.9± 42.7              |
|                    | <b>Phase (ZT)</b>                    | 3h07 ± 35 min             | 4h25 ± 43 min           | <b>Phase (ZT)</b>           | NS                       | NS                     | 14h53± 1h04             |
|                    | <b>p values</b>                      | <0.001                    | <0.001                  | <b>p values</b>             | 0.5                      | 0.14                   | 0.045                   |

**Table S1. Cosinor parameters related to circadian rhythms of circulating lymphocytes, monocytes and neutrophils**

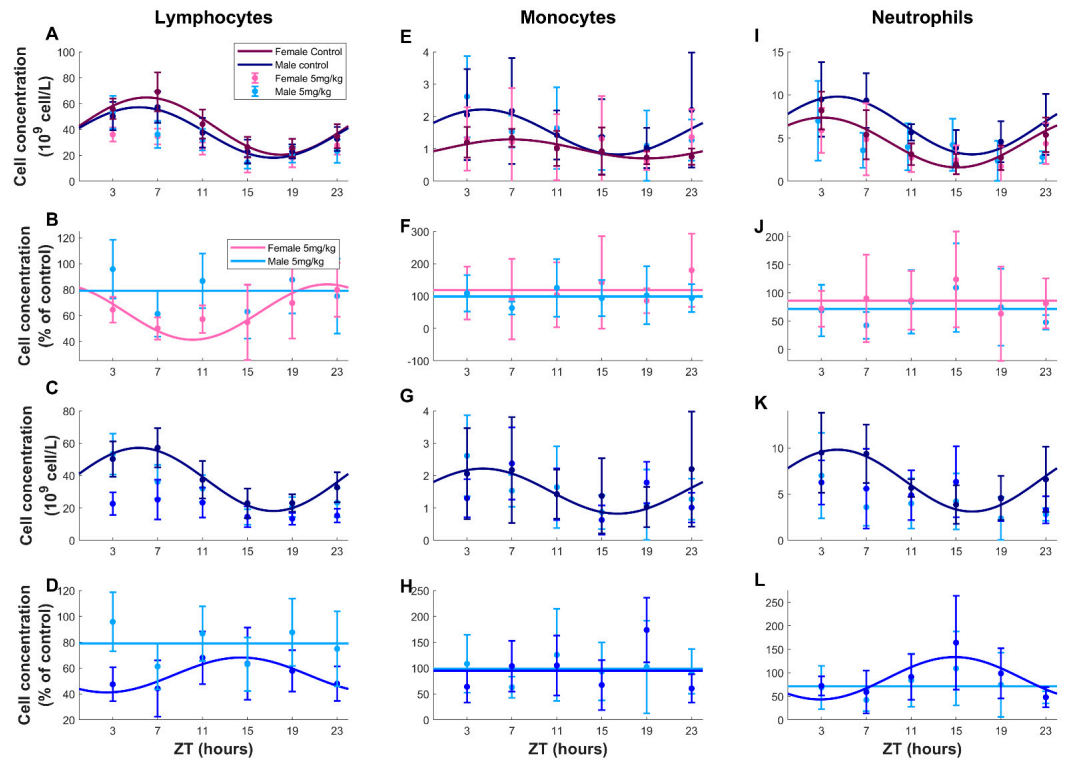

**Figure S1. Sex- and timing-dependent circulating lymphocyte, monocyte and neutrophil counts:** lymphocytes (A-D), monocytes (E-H), and neutrophils (I-L) platelets. Panels A, C, E, G, I, K show cell concentrations in control (datapoints, mean  $\pm$  SD) and treated (bars) conditions. Panels B, D, F, H, J, L show ratios between treated and control conditions (datapoints, mean  $\pm$  SD). On all panels, solid lines are the best-fit significant cosine curves. Data for males treated at 5mk/kg are repeated to ease comparison.

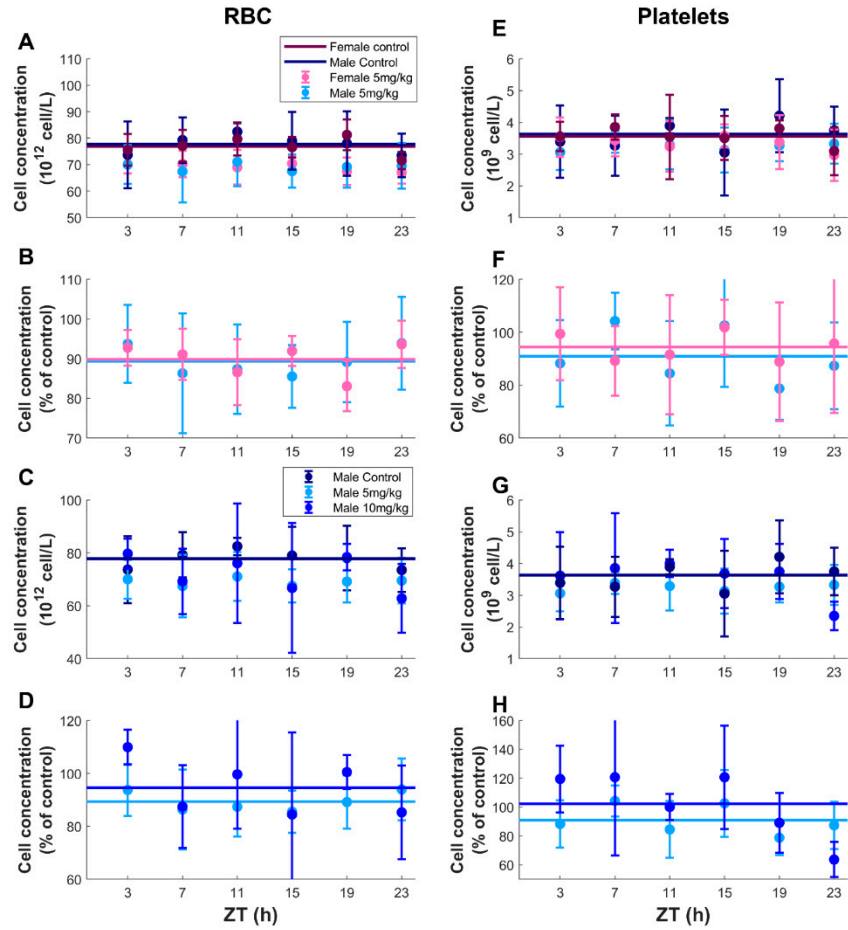

**Figure S2. Sex- and timing -dependent red blood cell and platelet counts (A,B,C,D) Red blood cells, (E,F,G,H) Platelets.** Panels A,C,E,G show cell numbers in control and treated conditions (data-points, mean  $\pm$  SD). Panels B, D, F, H show ratios between treated and control conditions (data-points, mean  $\pm$  SD). On all panels, solid lines are the best-fit significant cosine curves.

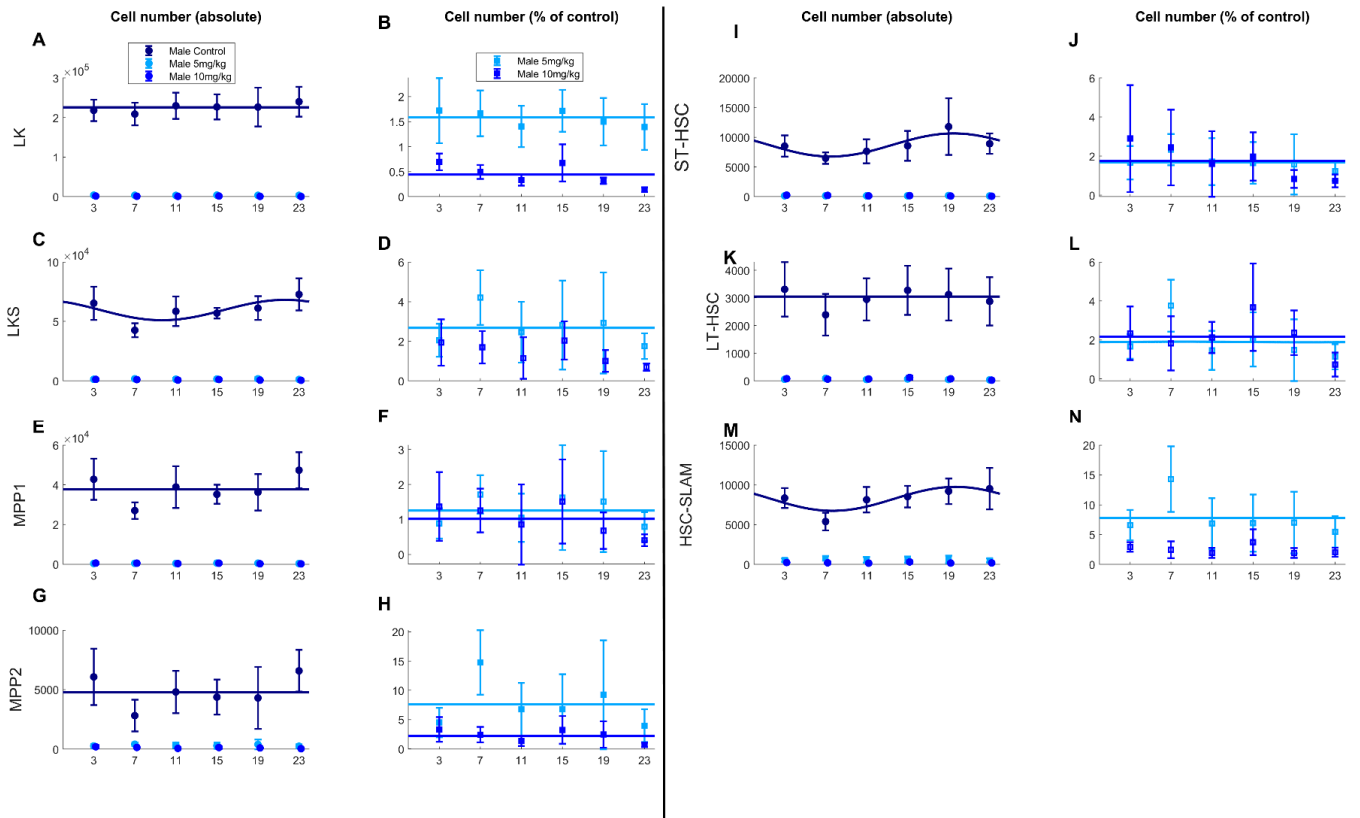

**Figure S3. Timing-dependent bone marrow progenitor cell numbers for the seven studied populations in males treated with 5 and 10 mg/kg.** Panels A, C, E, G, I, K, M show cell numbers in control and treated conditions (data-points, mean  $\pm$  SD). Panels B, D, F, H, J, L, N show ratios between treated and control conditions (datapoints, mean  $\pm$  SD). On all panels, solid lines are the best-fit significant cosine curves.
